# Supplementary material for: Anti-Mycobacterial Antibiotic Therapy Induces Remission in Active Paediatric Crohn’s Disease
Source: PubMed Central journal article supplement (PMC7464505; doi:10.3390/microorganisms8081112), 2020-07-24
Supplement: microorganisms-08-01112-s001.pdf [file microorganisms-08-01112-s001.pdf]

**Supplementary Table 1: Concomitant Medications Prescribed to Patients During Their Treatment with AMAT**

| <b>Patient Number</b> | <b>Concomitant Medication</b> | <b>Medication Class</b> | <b>Reason for Prescription</b>                             |
|-----------------------|-------------------------------|-------------------------|------------------------------------------------------------|
| 1                     | Prednisone                    | Steroidal               | To control acute flares                                    |
| 2                     | None                          | N/A                     | N/A                                                        |
| 3                     | Dehydroepiandrosterone        | Steroidal               | Treatment of only remaining symptom of tiredness           |
|                       | Sulfasalazine                 | 5-aminosalicylic        | Prevention of IDB recurrence after successful initial AMAT |
|                       | Mercaptopurine                | Immunomodulatory        | Weaning from previous treatment                            |
| 4                     | Prednisone                    | Steroidal               | To control acute flares                                    |
|                       | Azathioprine                  | Immunomodulatory        | Weaning from previous treatment                            |
| 5                     | None                          | N/A                     | N/A                                                        |
| 6                     | None                          | N/A                     | N/A                                                        |
| 7                     | None                          | N/A                     | N/A                                                        |
| 8                     | Prednisone                    | Steroidal               | Weaning from previous treatment                            |
|                       | Methotrexate                  | Immunomodulatory        | Weaning from previous treatment                            |
|                       | Budesonide                    | Steroidal               | To control acute flares                                    |
| 9                     | None                          | N/A                     | N/A                                                        |
| 10                    | None                          | N/A                     | N/A                                                        |
| 11                    | Prednisone                    | Steroidal               | To control acute flares                                    |
| 12                    | No Data                       | N/A                     | N/A                                                        |
| 13                    | Prednisone                    | Steroidal               | Weaning from previous treatment                            |
|                       | Azathioprine                  | Immunomodulatory        | Weaning from previous treatment                            |
| 14                    | Prednisone                    | Steroidal               | Weaning from previous treatment                            |
|                       | Methotrexate                  | Immunomodulatory        | To control acute flares                                    |
|                       | Budesonide                    | Steroidal               | To control acute flares                                    |
|                       | Mercaptopurine                | Immunomodulatory        | Weaning from previous treatment                            |
| 15                    | Mercaptopurine                | Immunomodulatory        | To control acute flares                                    |
| 16                    | Adalimumab                    | Anti-TNF                | Weaning from previous treatment                            |
